# Supplementary material for: Local Anaesthetic Thoracoscopy for Pleural Effusion—A Narrative Review
Source: MDPI journal article supplement (doi:10.3390/healthcare10101978), 2022-10-09
Supplement: s1 [file s1]

# Thoracoscopy

a

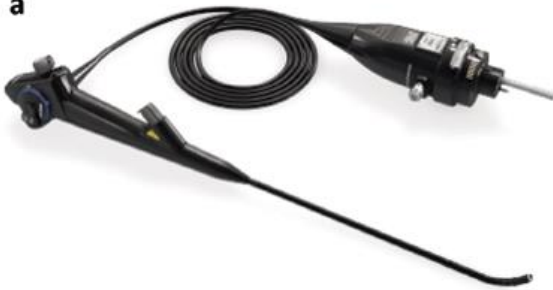

bi

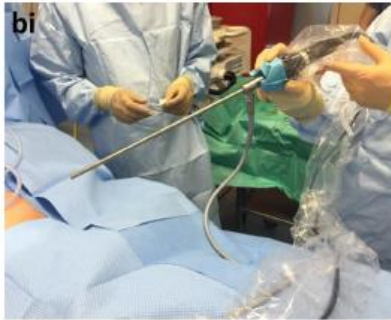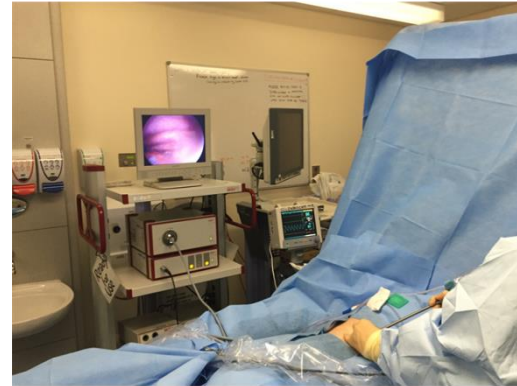

bii

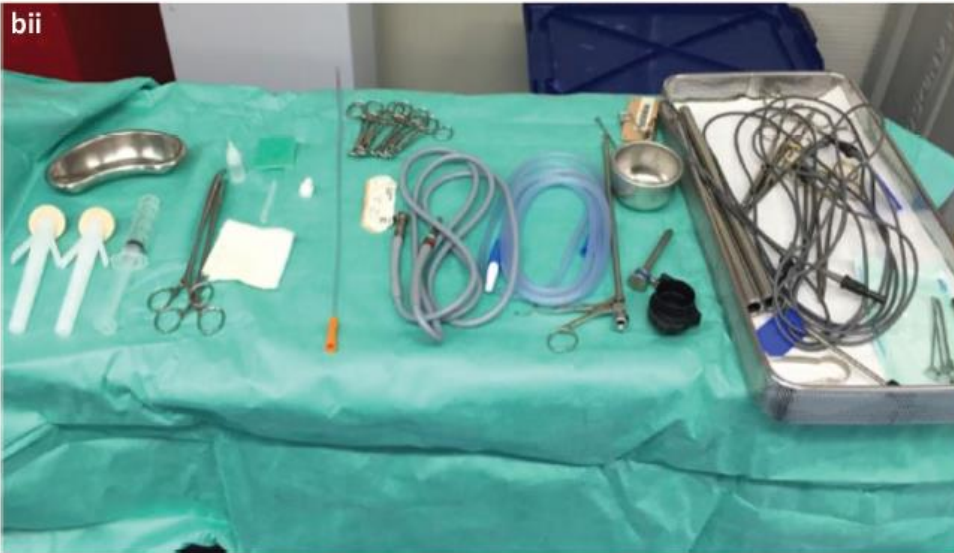

ai

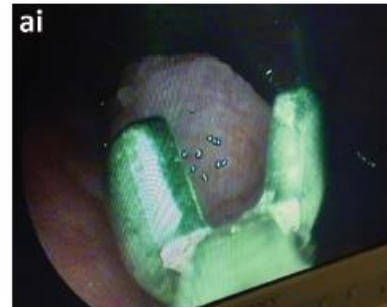

a ii

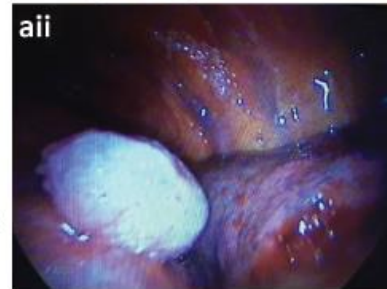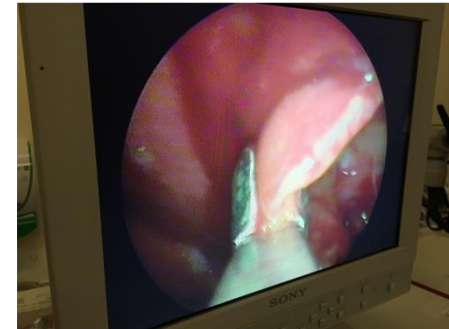

# Talc poudrage

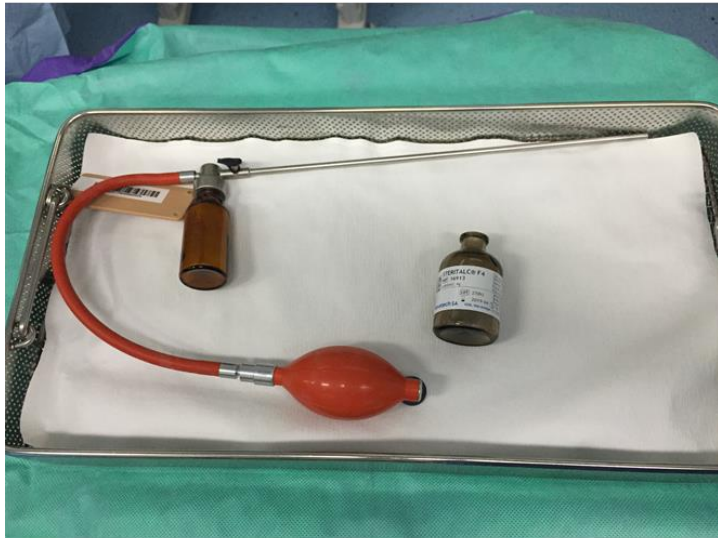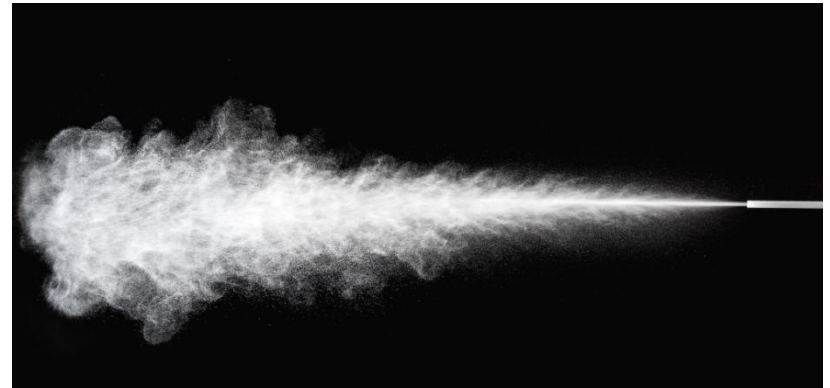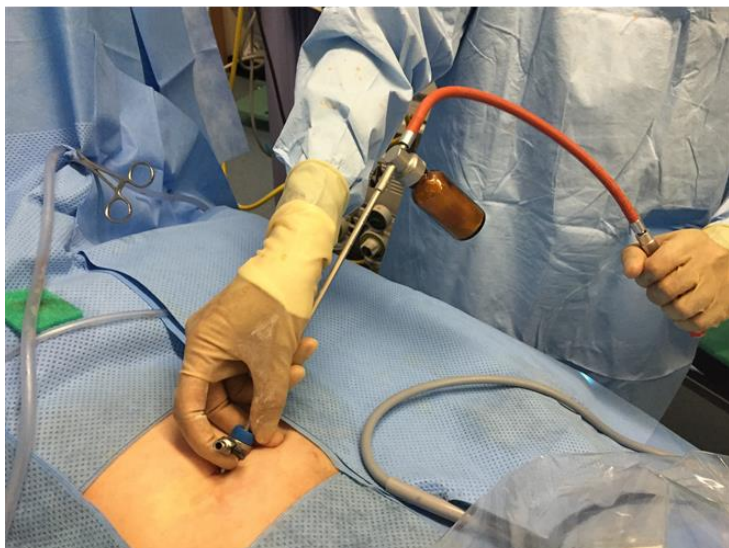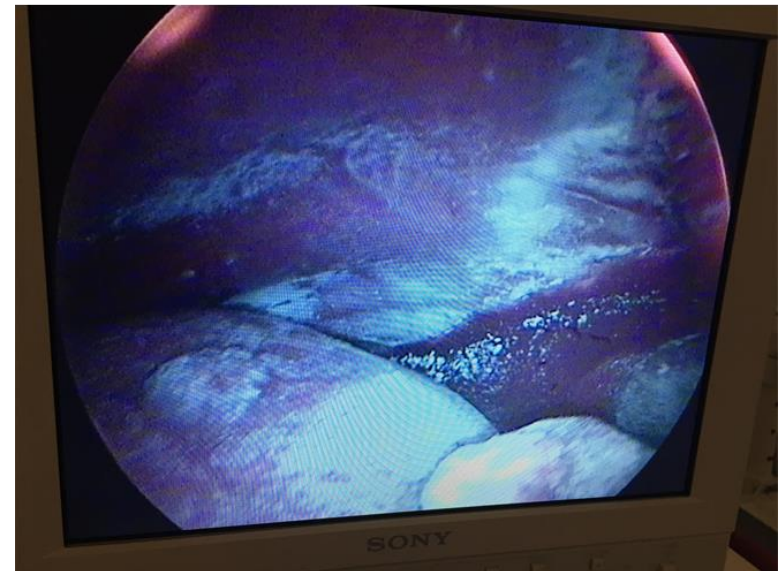

# Pre-procedure Imaging

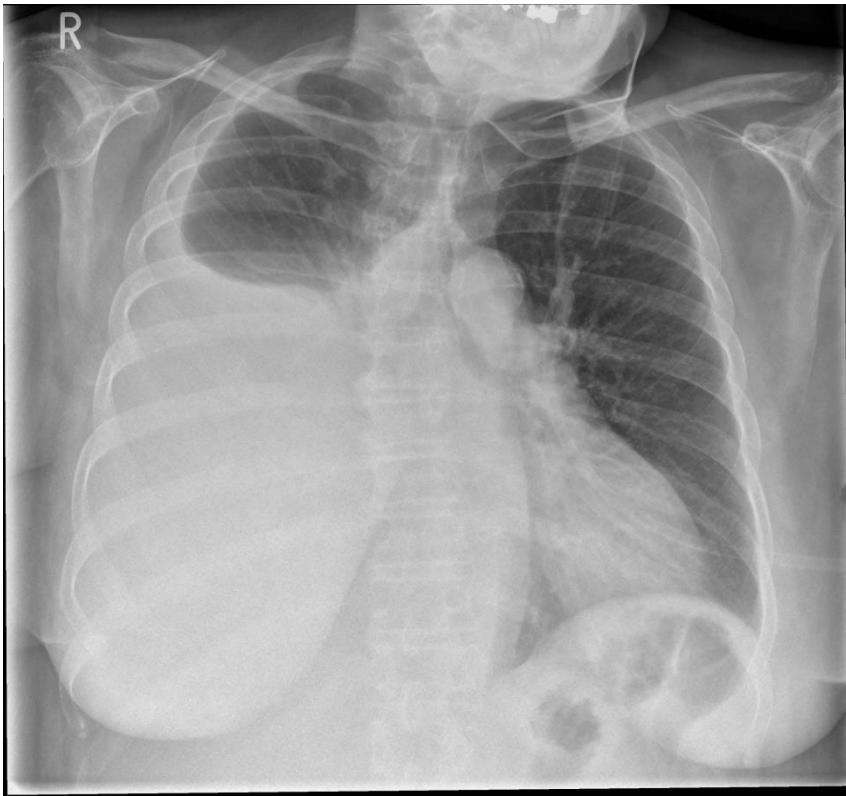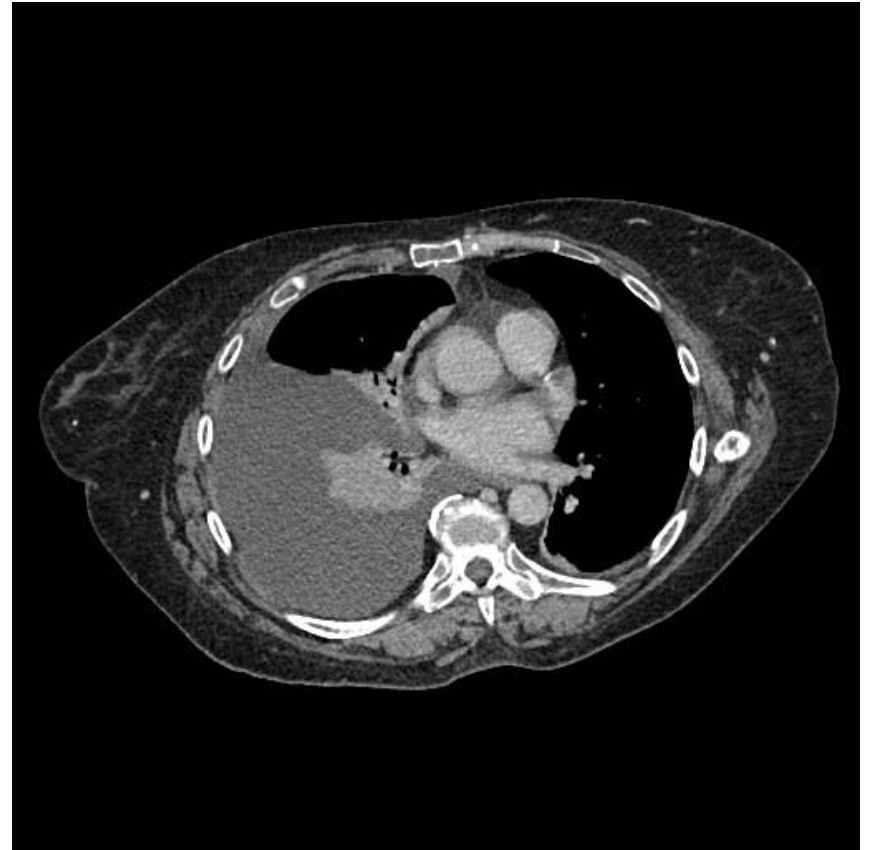



# Step by Step Thoracoscopy

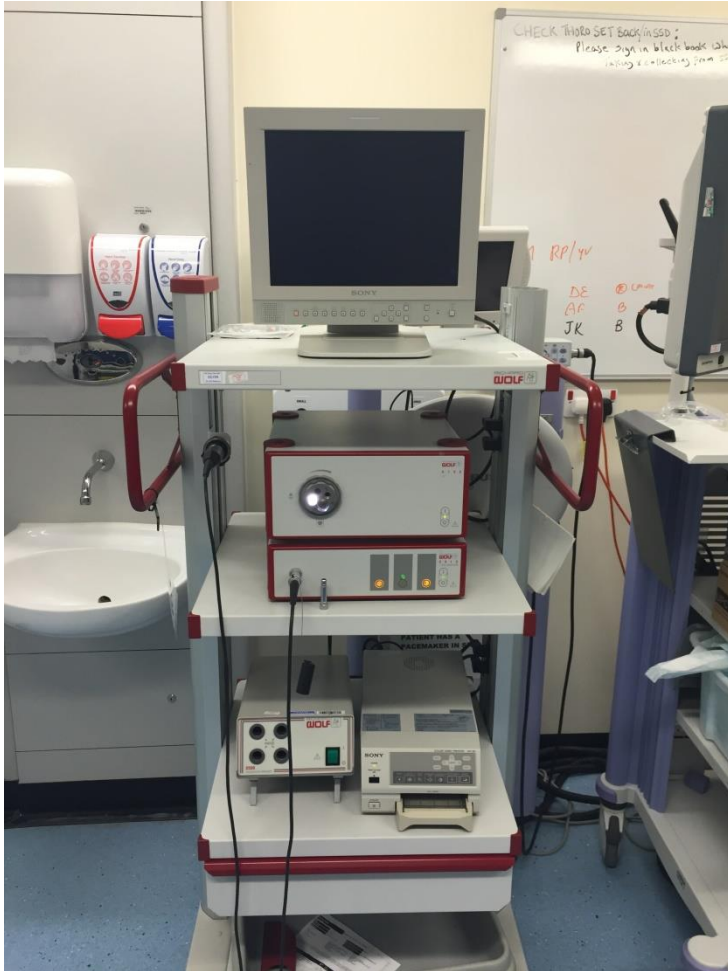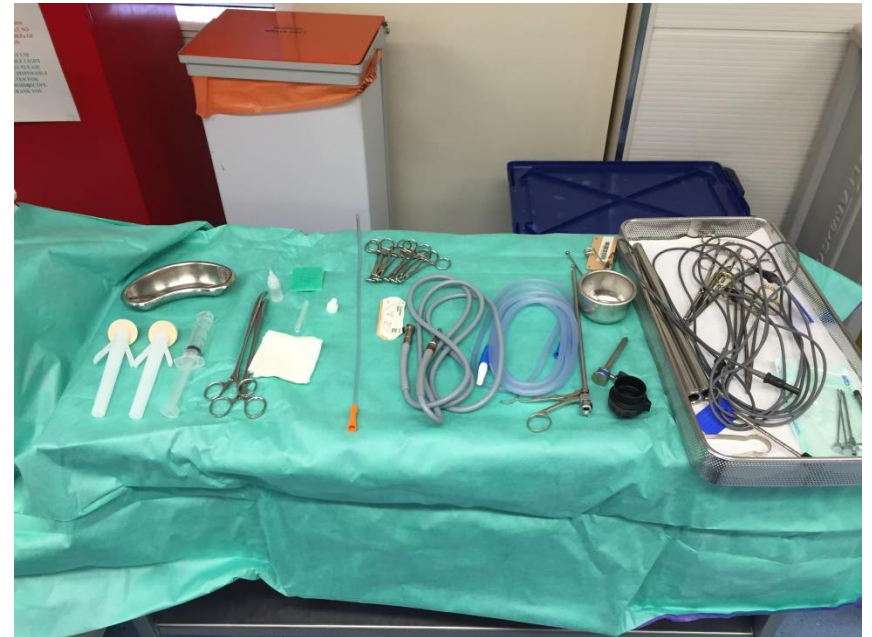

# Monitoring & USS

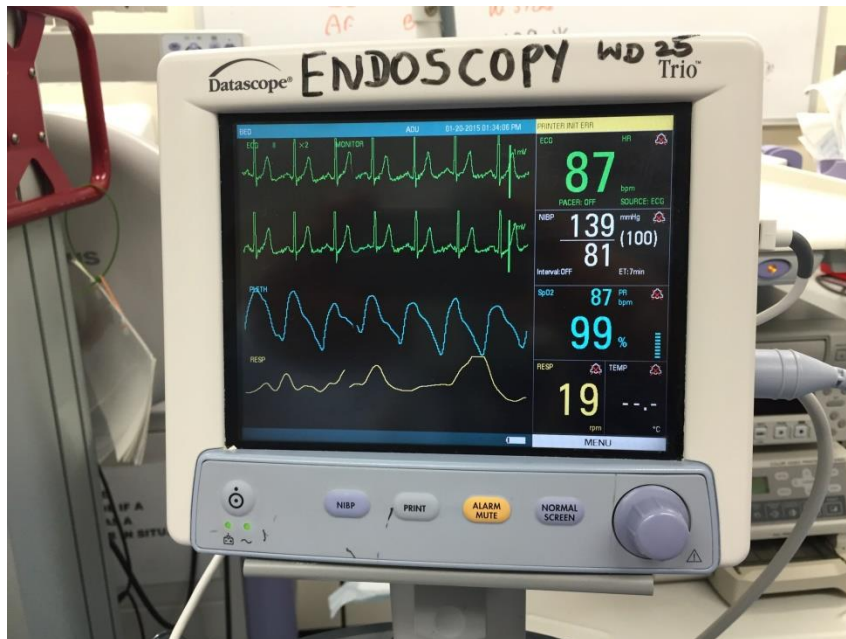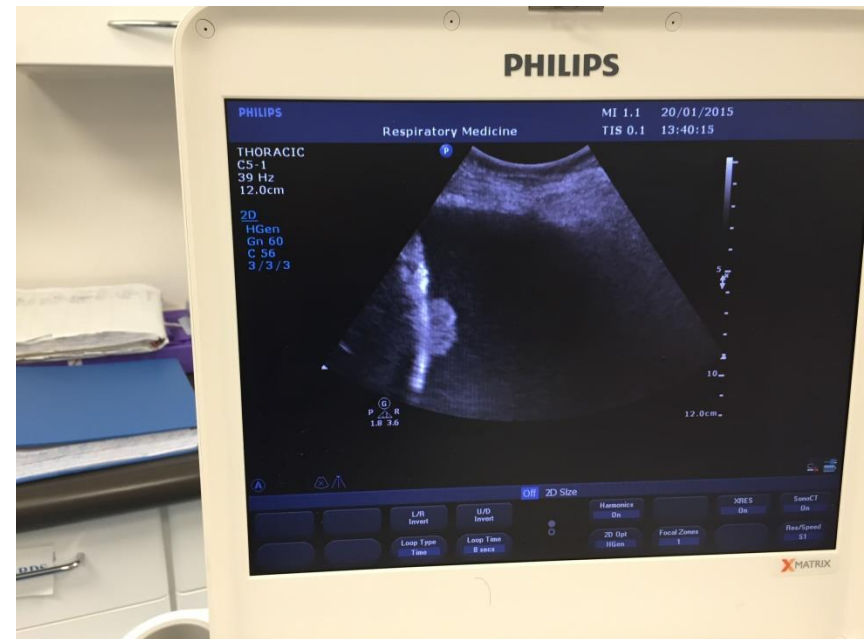

# Sedation & Local anaesthesia

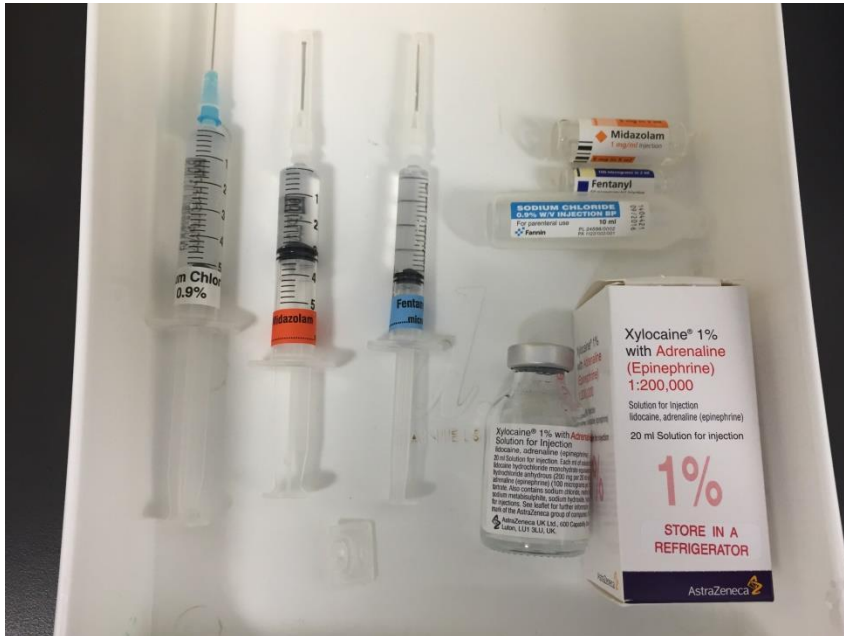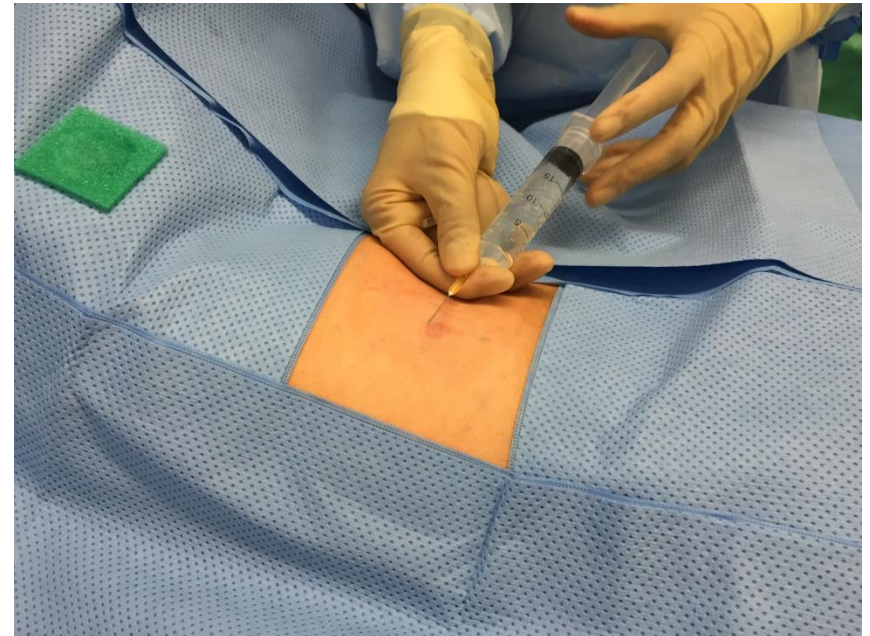



# Aspiration & equipment prep

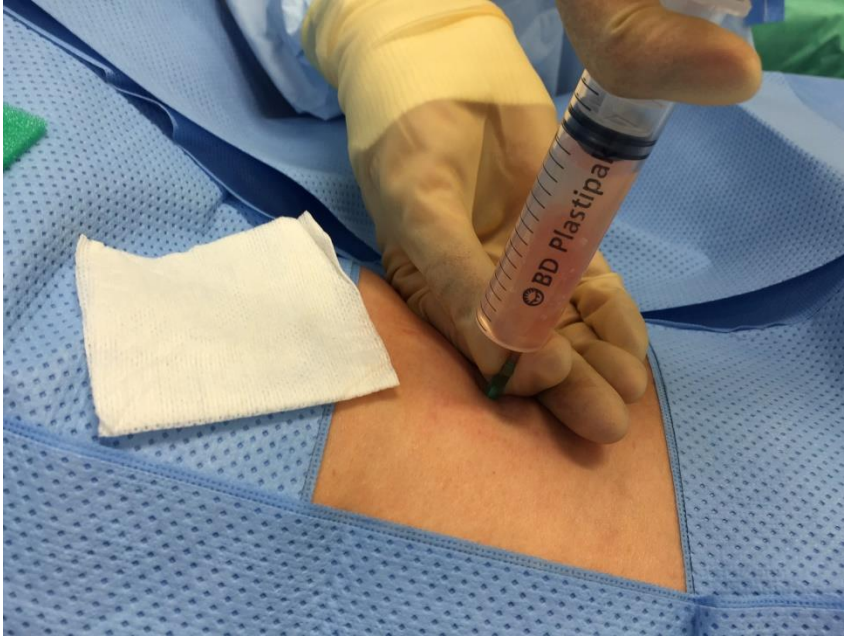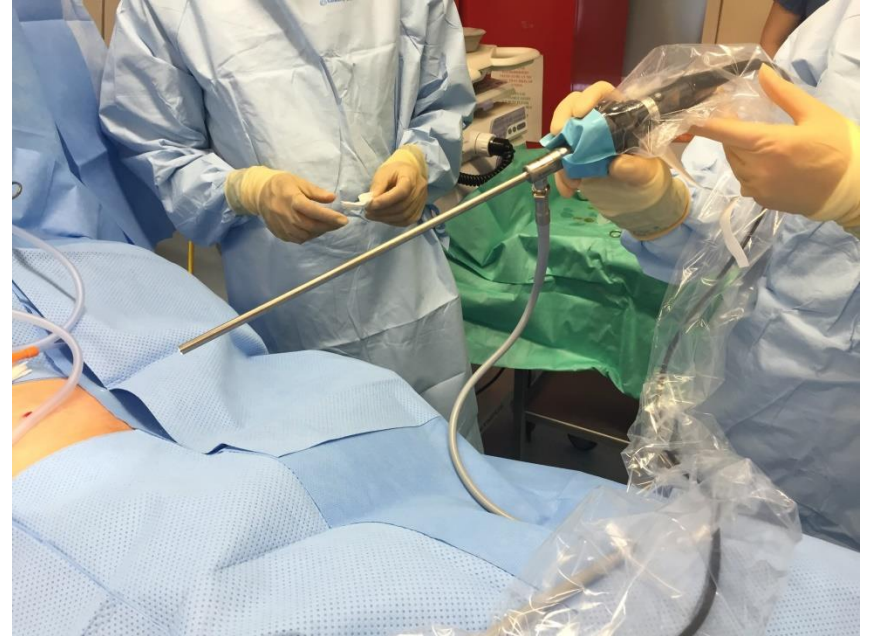

# Incision & blunt dissection

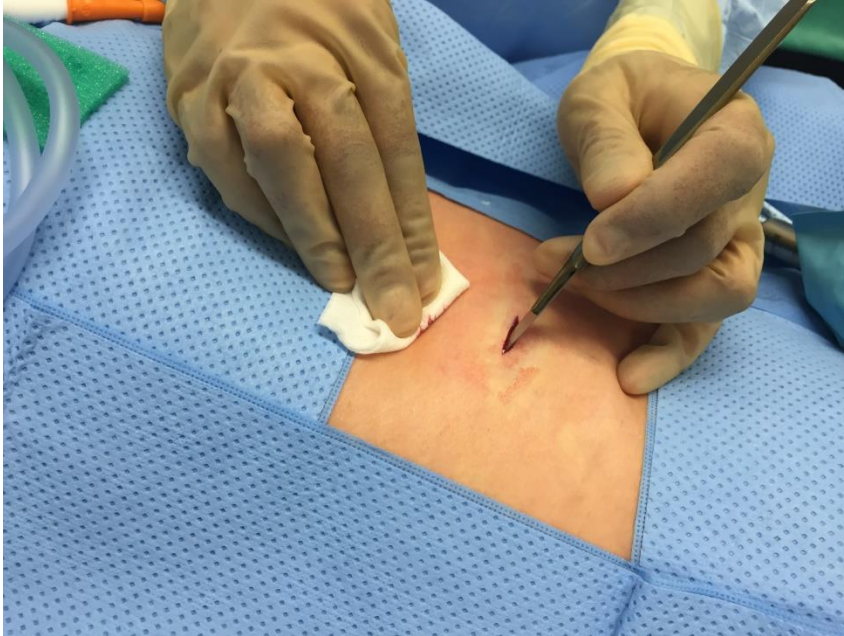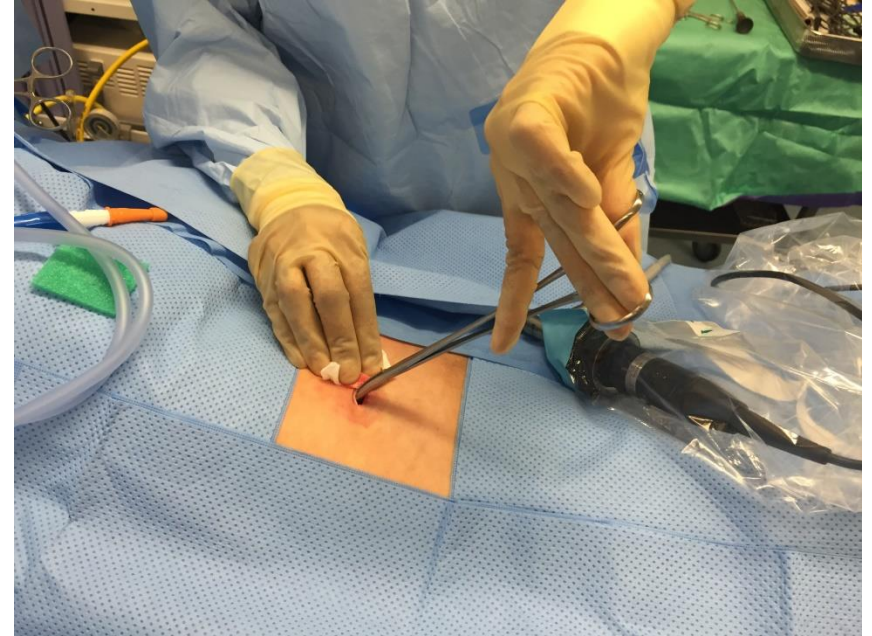



# Trocar & cannulae with valve

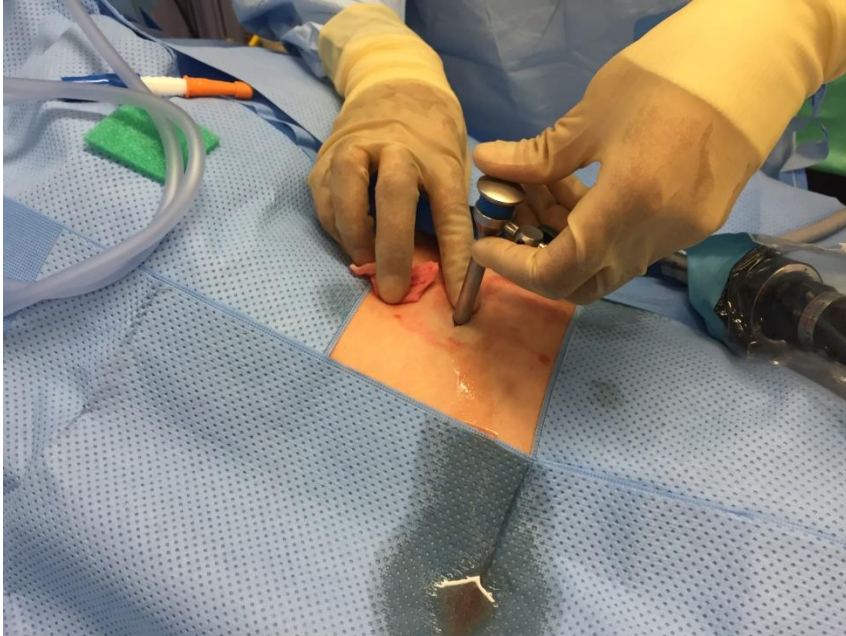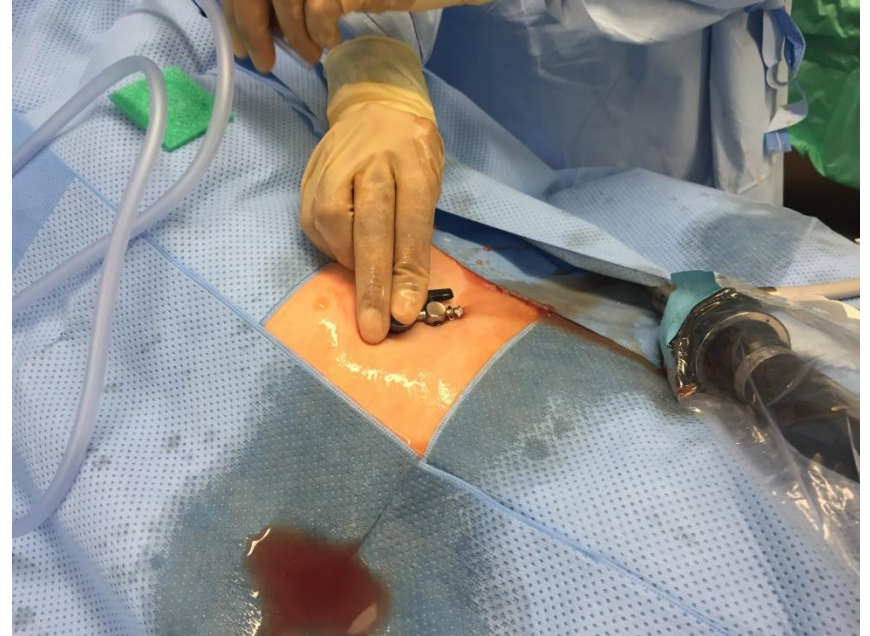

# Suction

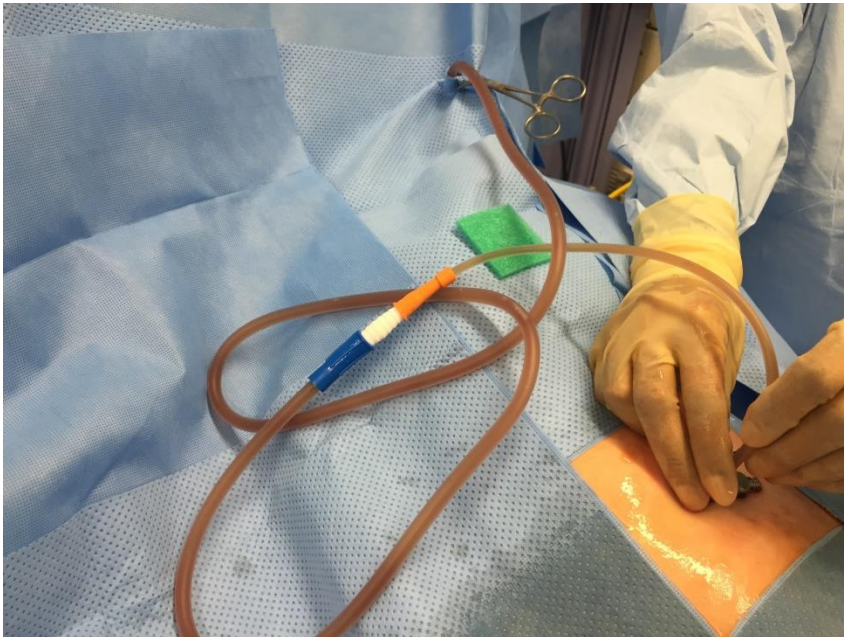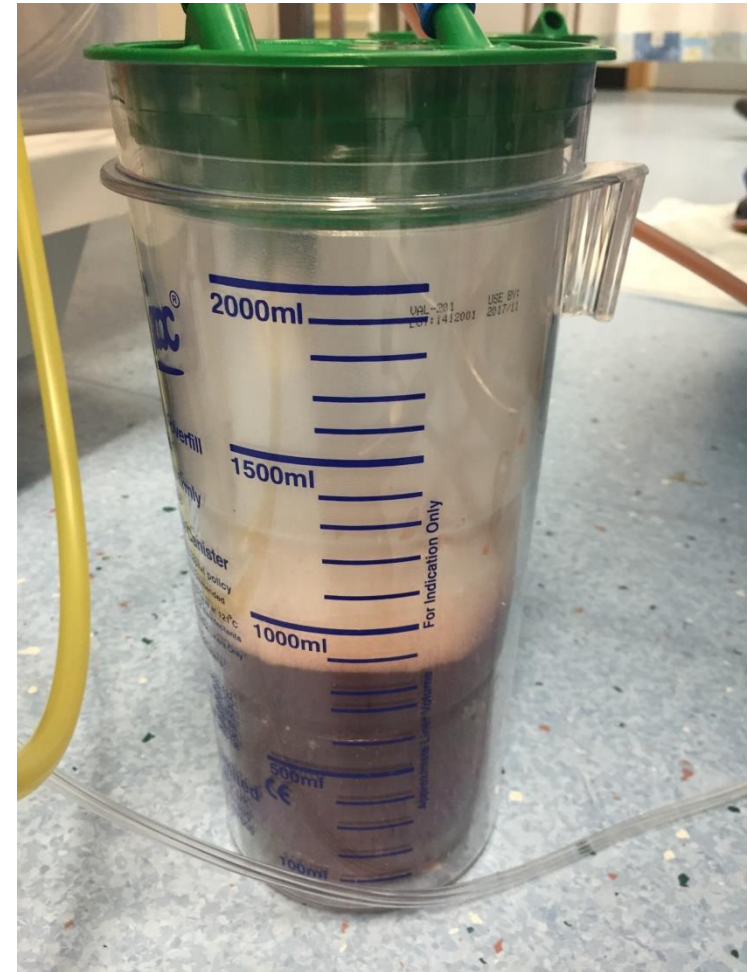

# Camera

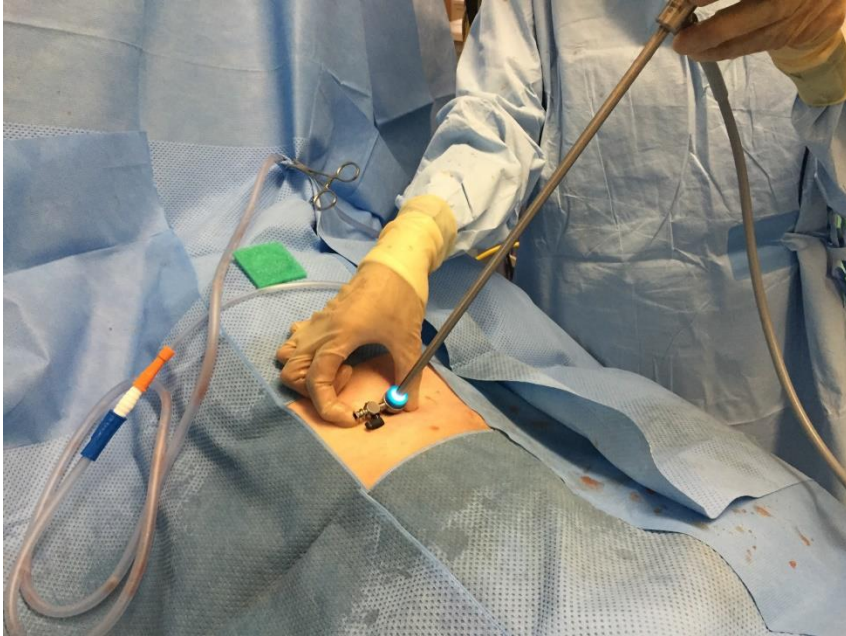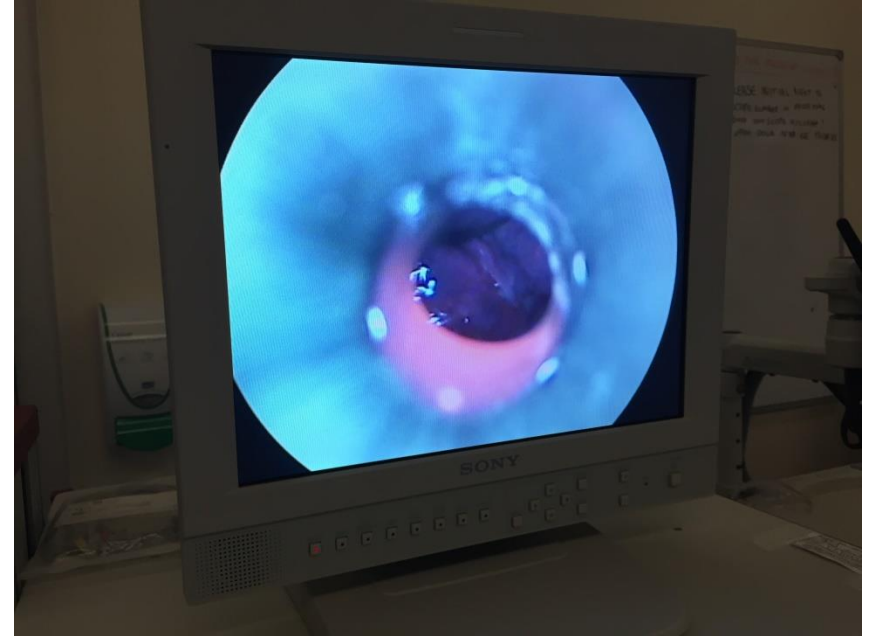



# Macroscopic pathology

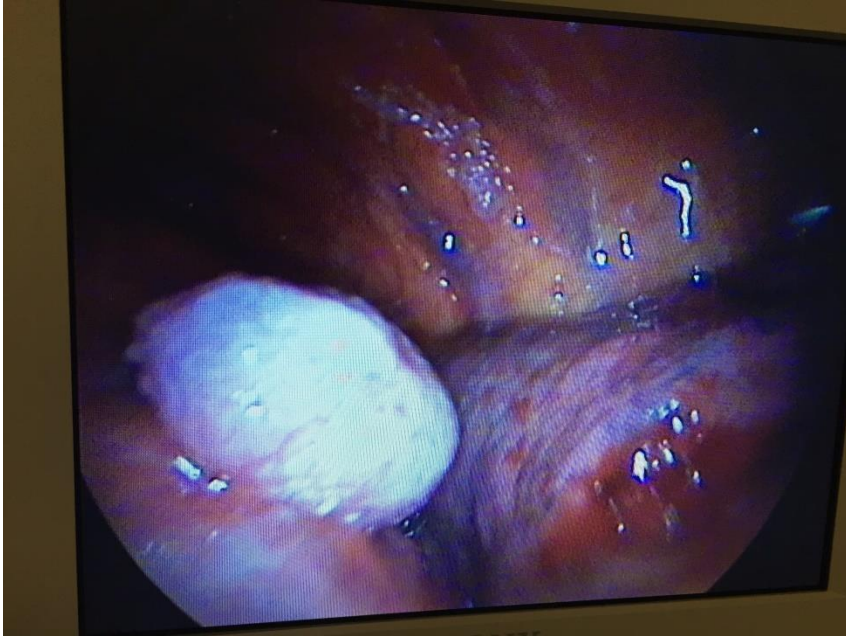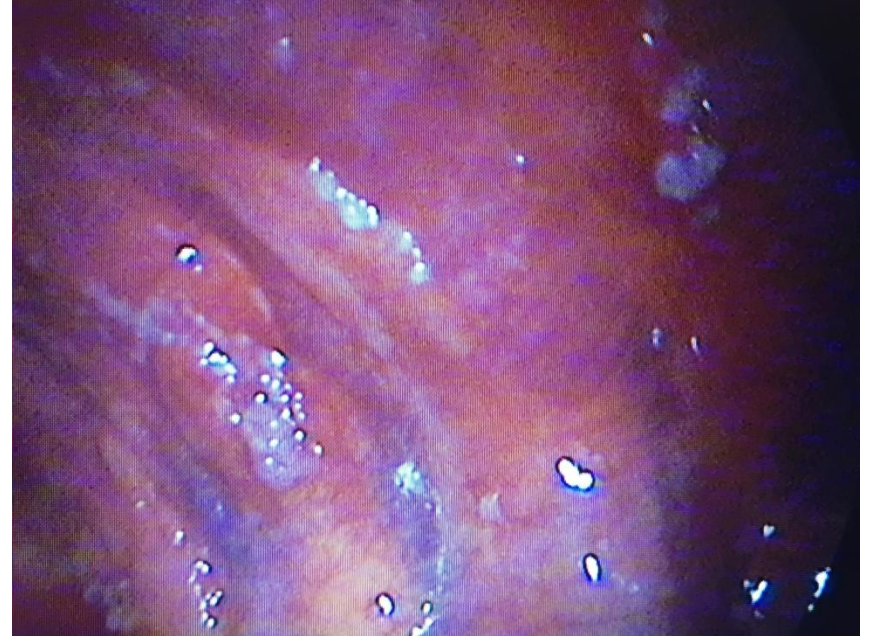

# Room set-up & biopsy forceps

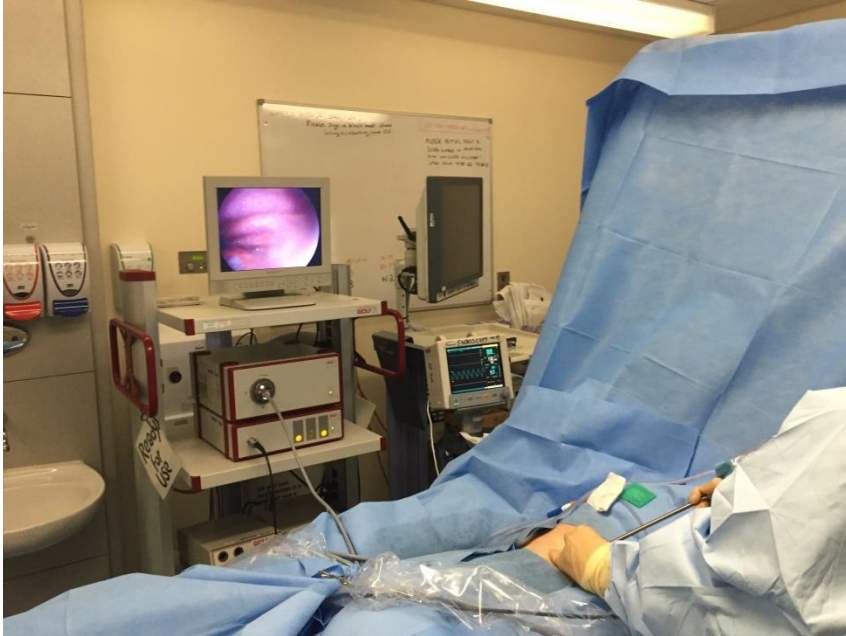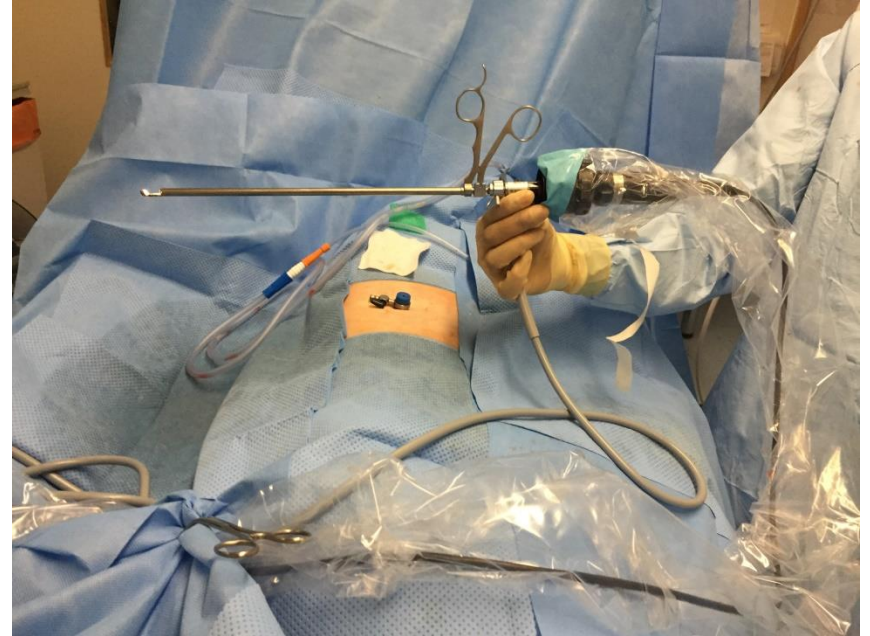

# Biopsies

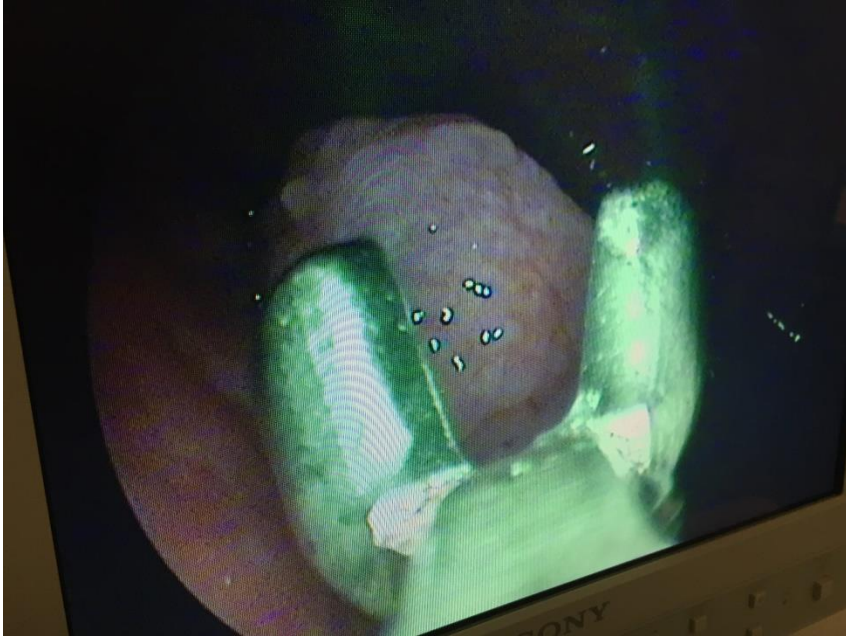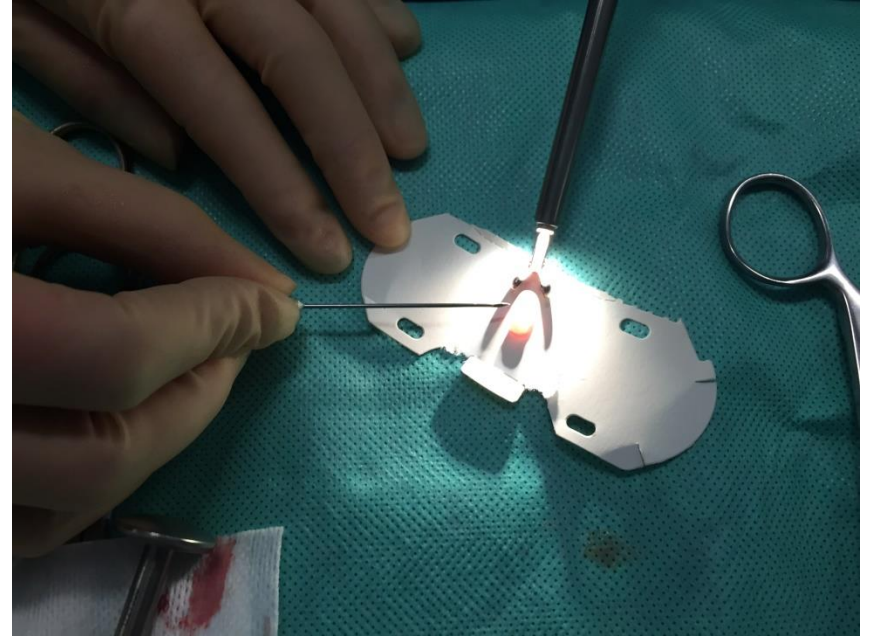



# Biopsies + talc poudrage kit

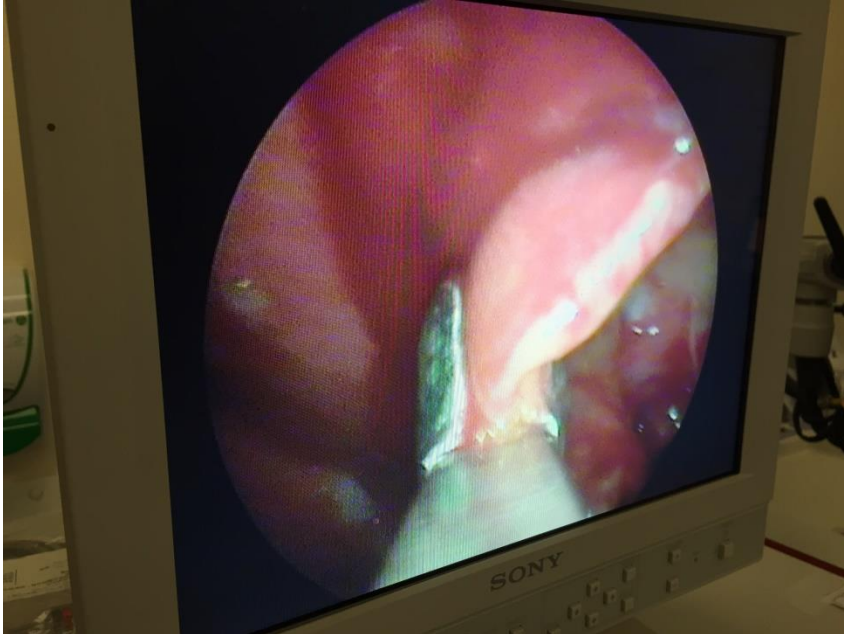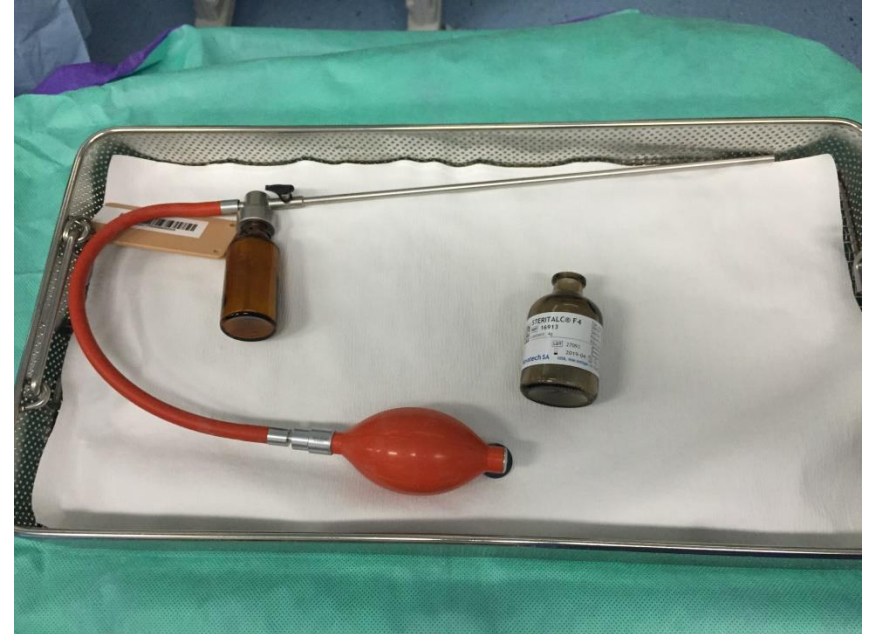

# Talc poudrage

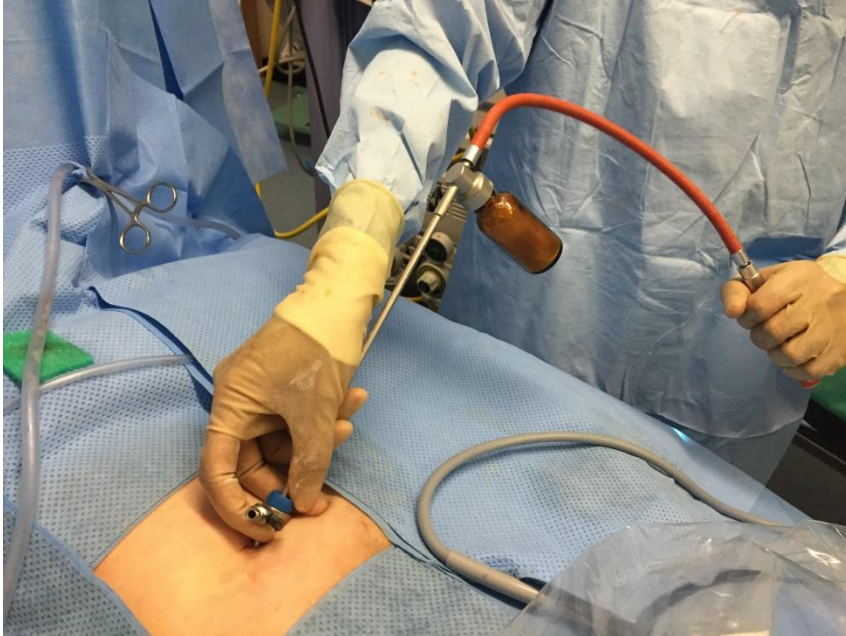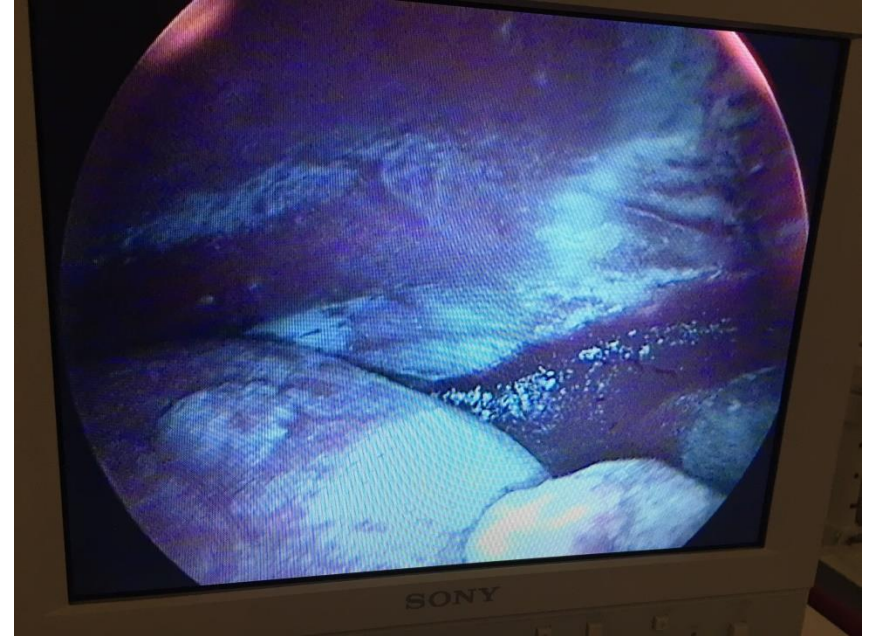



# Talc poudrage + wide bore drain

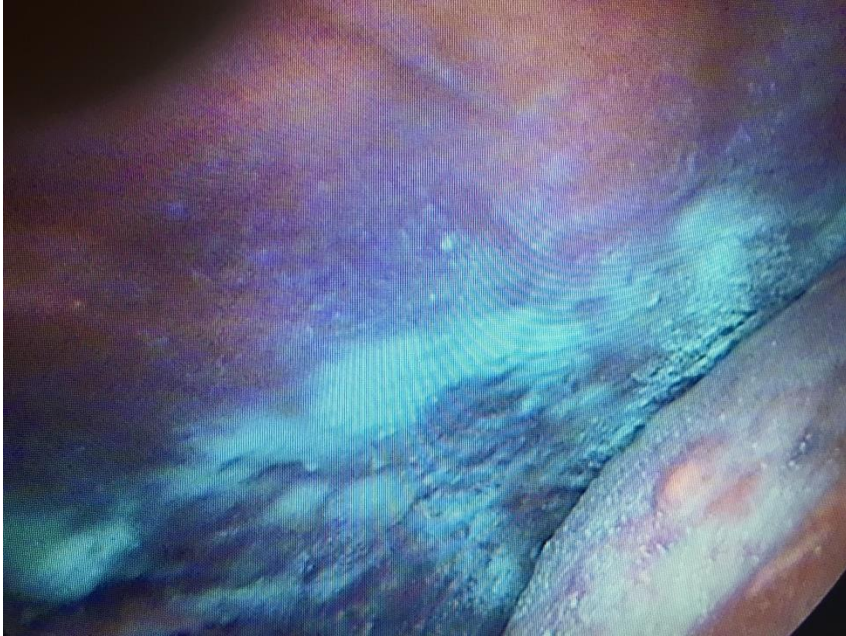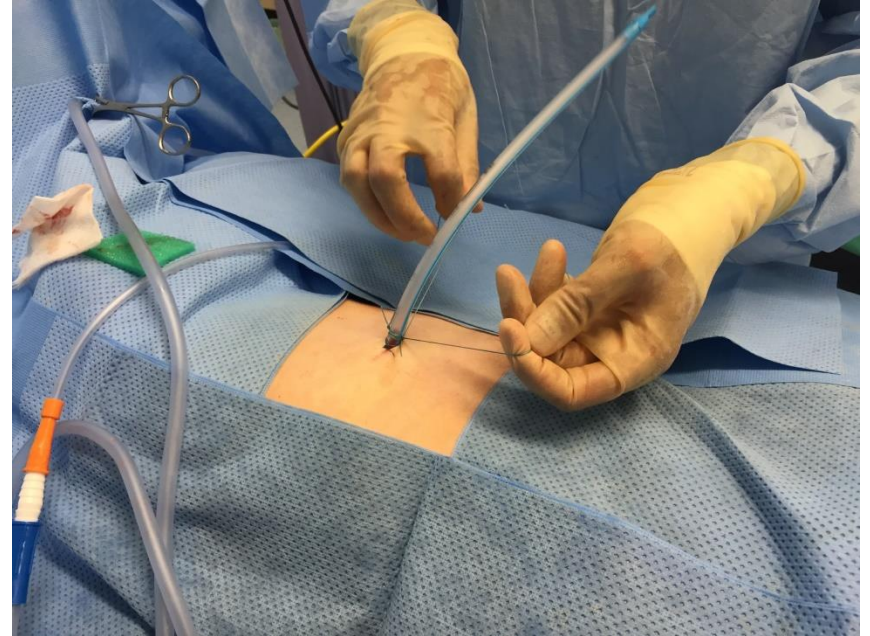



# Dressing & drain

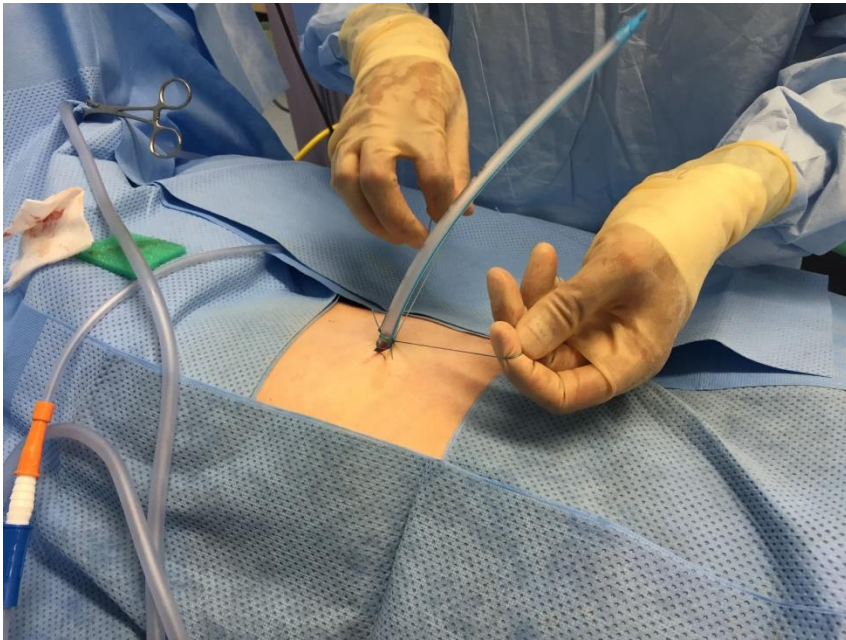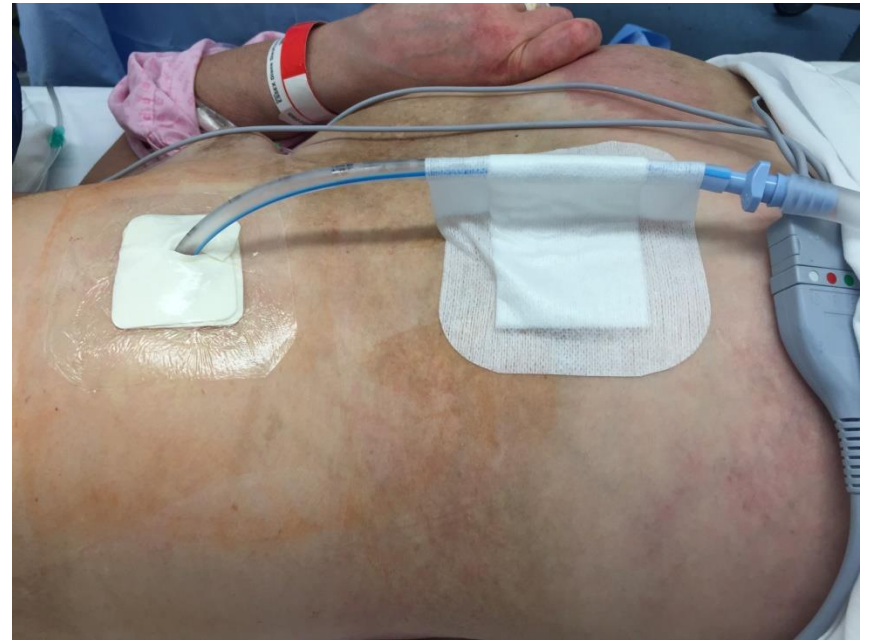

# Post-procedure imaging

**1 hour post LAVAT**

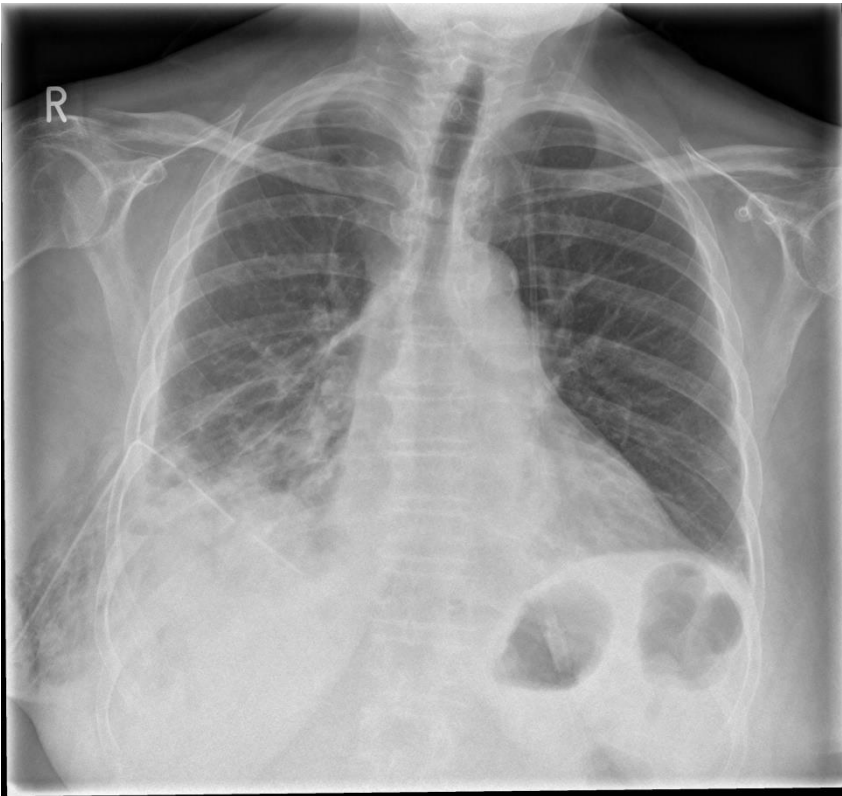

**1 week follow-up**

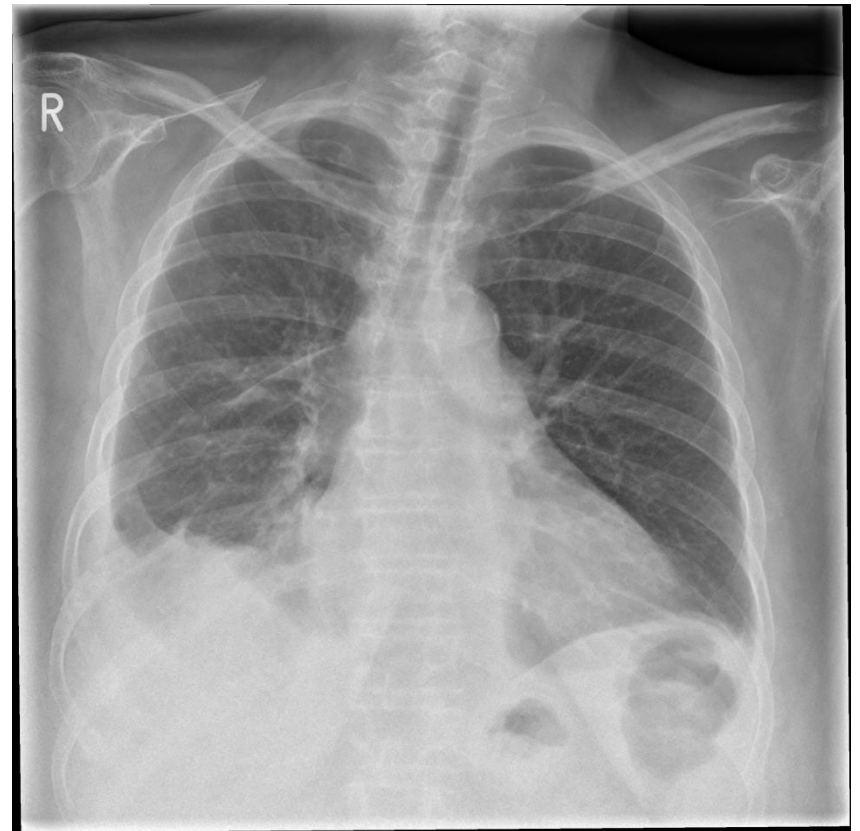

**Diagnosis: High Grade Serous Adenocarcinoma - Ovarian**
